# Supplementary material for: Analysis of PRX Gene Family and Its Function on Cell Lignification in Pears (Pyrus bretschneideri)
Source: MDPI journal article supplement (doi:10.3390/plants10091874), 2021-09-10
Supplement: s1 [file s1]

**Supplementary Table S1.** List of *PbPRX* and internal control genes primers used for qPCR gene expression.

| The primers used for amplifying PRX genes for Real-time PCR analysis |         |                          |
|----------------------------------------------------------------------|---------|--------------------------|
| PbPRX2                                                               | Forward | TCCTGCCCCAAACAACACAT     |
|                                                                      | Reverse | GTTGCCCCGACTGGTTGTAGA    |
| PbPRX3                                                               | Forward | GCCTTGTCAAAGATGCTGTCA    |
|                                                                      | Reverse | TGCCTTGTGTGTTTGCAGTGG    |
| PbPRX6                                                               | Forward | TGGGCGTGCTAGATGTCAAT     |
|                                                                      | Reverse | TCCAAATTGGTTAGCACACTGC   |
| PbPRX17                                                              | Forward | ATTCAGCTGGAAGTTACGACACC  |
|                                                                      | Reverse | TAGAAGTCAGCGTAGGAGAGGATG |
| PbPRX25                                                              | Forward | GCAATGAGCAGGATCCAGGT     |
|                                                                      | Reverse | CTGTCCATCTCCTTCTCAGACAAC |
| PbPRX27                                                              | Forward | CGGCACAGAAAGATGGCATT     |
|                                                                      | Reverse | TGCTTGATGGGCTCCAAGAG     |
| PbPRX53                                                              | Forward | ATCTCCCAGCTCATCCAGGT     |
|                                                                      | Reverse | TGTAAGTCGGGTCGAACTGC     |
| PbPRX74                                                              | Forward | GAAGGTCGTTTGCCAGATGC     |
|                                                                      | Reverse | CACCTACCCAAGGTGTGTCC     |
| PbPRX110                                                             | Forward | GATAAGCCGGAAAATCGGCTC    |
|                                                                      | Reverse | ACGAAGCATGAGAGGAGCAC     |
| PbPRX111/PbPRX55                                                     | Forward | CGCAAGATGCTACCATGGAC     |
|                                                                      | Reverse | ACCTTGGCGGTTTCATGAGAT    |
| Actin                                                                | Forward | TACTCTTTCACCACAACCTGC    |
|                                                                      | Reverse | CTCGTAACTCTTCTCCACAG     |
